# Supplementary material for: Efficient triplet utilization in conventional solution-processed phosphorescent organic light emitting diodes using a thermal activated delayed fluorescence polymer as an assistant host
Source: Royal Society of Chemistry journal article supplement (doi:10.1039/c8tc00587g), 2018-01-01
Supplement: c8tc00587g1.pdf [file c8tc00587g1.pdf]

## Supporting Information

### A Strategy for Efficient Triplet Utilization in Conventional Solution-processed Phosphorescent Organic Light Emitting Diodes Using a Thermal Activated Delayed Fluorescence Polymer as an Assistant Host

Dianming Sun, Zhongjie Ren\* and Shouke Yan\*

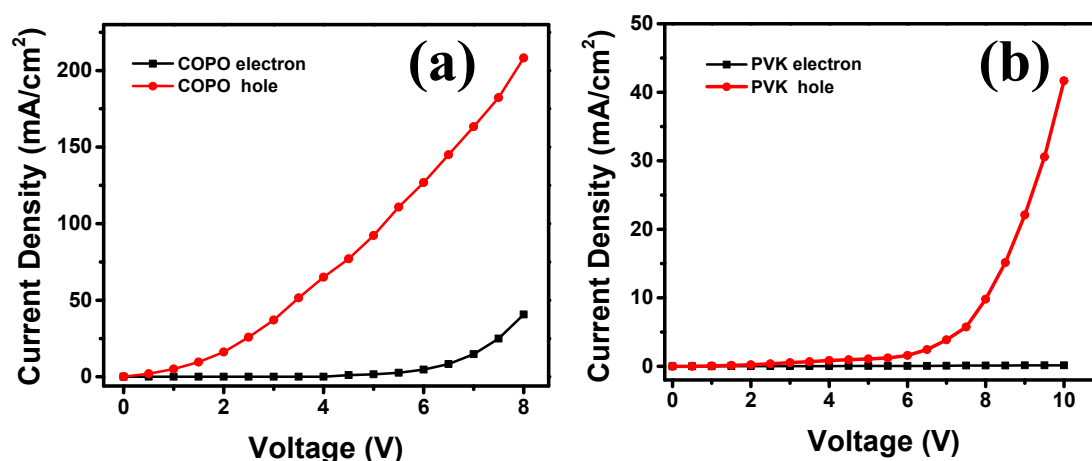

Figure S1. J-V curves of the hole-only and electron-only devices for (a) COPO and (b) PVK.

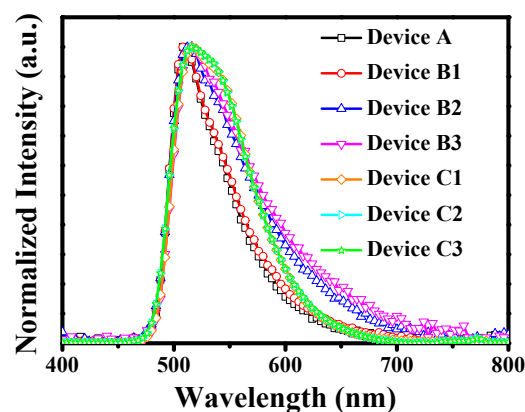

Figure S2. Electroluminescent spectra of devices at 9V.
